# Supplementary material for: Medical record: systematic centralization versus secure on demand aggregation
Source: Springer Nature journal article supplement (doi:10.1186/1472-6947-11-18), 2011-03-22

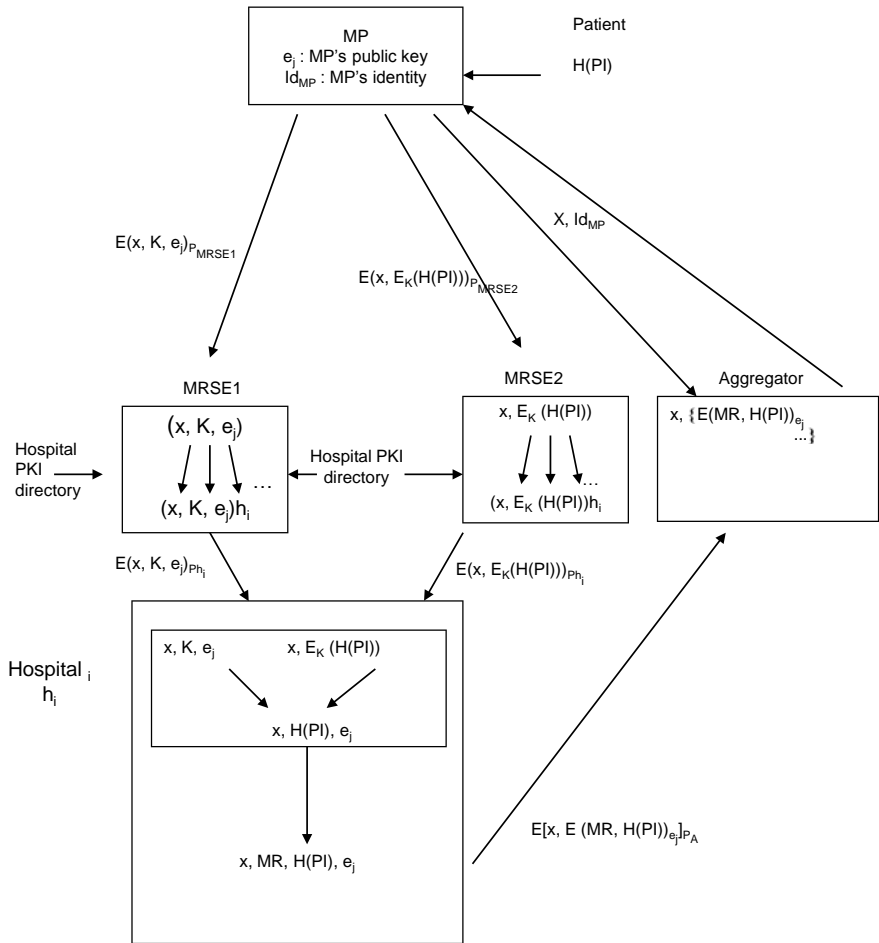

Supplement: 12911_2010_395_MOESM1_ESM.pdf [file 12911_2010_395_MOESM1_ESM.pdf]
